# Supplementary material for: Psychopharmacological Treatment in the RAISE-ETP Study: Outcomes of a Manual and Computer Decision Support System Based Intervention
Source: Atypon-hosted journal article supplement (doi:10.1176/appi.ajp.2017.16080919), 2017-09-25
Supplement: appi.ajp.2017.16080919.ds001.pdf [file appi.ajp.2017.16080919.ds001.pdf]

**TABLE S1. Demographic and Clinical Characteristics of Participants at Baseline**

|                                                  | Community Care<br>(N = 181) |    | NAVIGATE<br>(N = 223) |    |      |        |                      |
|--------------------------------------------------|-----------------------------|----|-----------------------|----|------|--------|----------------------|
| Categorical Variables                            | N                           | %  | N                     | %  | F    | Df     | p-value <sup>1</sup> |
| Male                                             | 120                         | 66 | 173                   | 78 | 3.86 | 1, 370 | 0.05                 |
| Race                                             |                             |    |                       |    | 1.28 | 2, 336 | 0.28                 |
| White                                            | 80                          | 44 | 138                   | 62 |      |        |                      |
| African American                                 | 89                          | 49 | 63                    | 28 |      |        |                      |
| Other                                            | 12                          | 7  | 22                    | 10 |      |        |                      |
| Hispanic ethnicity                               | 18                          | 10 | 55                    | 25 | 3.24 | 1, 370 | 0.07                 |
| Type of insurance                                |                             |    |                       |    | 1.28 | 2, 333 | 0.28                 |
| Private                                          | 27                          | 15 | 55                    | 25 |      |        |                      |
| Public                                           | 66                          | 37 | 61                    | 27 |      |        |                      |
| Uninsured                                        | 88                          | 49 | 104                   | 47 |      |        |                      |
| Diagnosis                                        |                             |    |                       |    | 0.58 | 5, 234 | 0.72                 |
| Schizophrenia                                    | 101                         | 56 | 113                   | 51 |      |        |                      |
| Schizoaffective bipolar                          | 13                          | 7  | 11                    | 5  |      |        |                      |
| Schizoaffective depressive                       | 25                          | 14 | 32                    | 14 |      |        |                      |
| Schizophreniform provisional or definite         | 24                          | 13 | 43                    | 19 |      |        |                      |
| Brief psychotic disorder                         | 1                           | 1  | 1                     | 1  |      |        |                      |
| Psychotic disorder NOS                           | 17                          | 9  | 23                    | 10 |      |        |                      |
| Lifetime alcohol use                             |                             |    |                       |    | 2.49 | 2, 336 | 0.08                 |
| Did not meet criteria                            | 123                         | 68 | 134                   | 60 |      |        |                      |
| Met abuse criteria                               | 16                          | 9  | 36                    | 16 |      |        |                      |
| Met dependence criteria                          | 42                          | 23 | 53                    | 24 |      |        |                      |
| Lifetime cannabis use                            |                             |    |                       |    | 146  | 2, 336 | 0.23                 |
| Did not meet criteria                            | 123                         | 68 | 137                   | 61 |      |        |                      |
| Met abuse criteria                               | 21                          | 12 | 39                    | 18 |      |        |                      |
| Met dependence criteria                          | 37                          | 20 | 47                    | 21 |      |        |                      |
| Prescribed one or more antipsychotics at consent | 155                         | 86 | 182                   | 82 | 0.36 | 1, 370 | 0.55                 |
| Number of prior hospitalizations                 |                             |    |                       |    | 3.91 | 1, 368 | 0.05                 |
| 0                                                | 34                          | 19 | 54                    | 24 |      |        |                      |
| 1                                                | 75                          | 41 | 106                   | 48 |      |        |                      |
| 2                                                | 32                          | 18 | 37                    | 17 |      |        |                      |
| 3 or more                                        | 40                          | 22 | 24                    | 11 |      |        |                      |

|                                                                  | Community Care<br>(N = 181) |        | NAVIGATE<br>(N = 223) |        |      |        |                      |
|------------------------------------------------------------------|-----------------------------|--------|-----------------------|--------|------|--------|----------------------|
| Continuous Variables                                             | Mean                        | SD     | Mean                  | SD     | F    | Df     | p-value <sup>1</sup> |
| Age                                                              | 23.08                       | 4.90   | 23.18                 | 5.21   | 0.14 | 1, 370 | 0.71                 |
| Duration of untreated psychosis (weeks)                          | 211.43                      | 277.49 | 178.91                | 248.73 | 0.97 | 1, 369 | 0.33                 |
| Heinrichs-Carpenter Quality of Life Scale Total score            | 54.77                       | 18.99  | 50.89                 | 18.44  | 2.70 | 1, 369 | 0.10                 |
| Positive and Negative Syndrome Scale Total score                 | 74.54                       | 14.87  | 78.32                 | 14.95  | 5.56 | 1, 369 | 0.02                 |
| Calgary Depression Scale for Schizophrenia                       | 4.66                        | 4.30   | 4.65                  | 4.27   | 0.01 | 1, 369 | 0.99                 |
| Clinical Global Impressions Scale-severity of illness            | 3.96                        | 0.83   | 4.12                  | 0.80   | 3.37 | 1, 369 | 0.07                 |
| Duration of lifetime anti-psychotic medication at consent (days) | 48.46                       | 48.98  | 40.60                 | 42.88  | 2.74 | 1, 369 | 0.10                 |

<sup>1</sup> p values were adjusted for the clustered design by using linear, negative binomial, logit or generalized logit mixed effects model with cluster-specific random effects

**TABLE S2. Presence of Specific Side Effects**

| Side effect group                 | Odds ratio between conditions <sup>2</sup> | 95% Confidence Interval of odds ratio |       | Effect size for difference | Comparison across treatments |    |    |                    |                                           |
|-----------------------------------|--------------------------------------------|---------------------------------------|-------|----------------------------|------------------------------|----|----|--------------------|-------------------------------------------|
|                                   |                                            |                                       |       |                            | F value                      | Df |    | P-value unadjusted | P-value adjusted for multiple comparisons |
| sedation                          | 0.500                                      | 0.295                                 | 0.846 | -0.3821521                 | 7.19                         | 1  | 32 | 0.0115             | 0.0435                                    |
| extrapyramidal symptoms           | 0.694                                      | 0.481                                 | 1.001 | -0.2013912                 | 4.13                         | 1  | 32 | 0.0504             | 0.0605                                    |
| anticholinergic side effects      | 0.582                                      | 0.380                                 | 0.892 | -0.2984260                 | 6.68                         | 1  | 32 | 0.0145             | 0.0435                                    |
| increased appetite or weight gain | 0.719                                      | 0.533                                 | 0.970 | -0.1818801                 | 5.02                         | 1  | 32 | 0.0321             | 0.0567                                    |
| sexual problems                   | 0.629                                      | 0.406                                 | 0.973 | -0.2556093                 | 4.70                         | 1  | 32 | 0.0378             | 0.0567                                    |
| Menstrual problems                | 0.608                                      | 0.274                                 | 1.347 | -0.2743305                 | 1.63                         | 1  | 31 | 0.2113             | 0.2113                                    |

<sup>1</sup> The models included treatment condition, time and the treatment-by-time interaction. No significant treatment-by-time interaction was revealed in any analysis.

<sup>2</sup> Odds ratios less than 1.0 indicate more likelihood of being reported at Community Care sites; ratios greater than 1.0 indicate more likelihood of being reported at NAVIGATE sites
